# Supplementary material for: Fe-single-atom-coupled Fe 3 C multifunctional catalysts on P-, F-, N-doped carbon nanotubes for stable Zn–air batteries with ultra-high power densities
Source: Royal Society of Chemistry journal article supplement (doi:10.1039/d4ta04194a), 2024-01-01
Supplement: d4ta04194a1.pdf [file d4ta04194a1.pdf]

# Fe single atoms coupled Fe<sub>3</sub>C multi-functional catalysts on P, F, N-doped carbon nanotubes for stable Zn-air batteries with ultra-high power densities

Manigandan Ramadoss<sup>1\*</sup>, Hesheng Yu<sup>1</sup>, Anand Rajkamal<sup>2</sup>, Gun Jin Yun<sup>2,3</sup>, Ziheng Zhang<sup>1</sup>, Chengtao Yang<sup>1\*</sup>, Fei Ma<sup>1</sup>, Yu Wu<sup>1</sup>, Chen Daiqian<sup>1</sup>, and Yuanfu Chen<sup>1,4\*</sup>

<sup>1</sup>Yangtze Delta Region Institute (Huzhou), University of Electronic Science and Technology of China, Huzhou 313001, China

<sup>2</sup>Institute of Advanced Aerospace Technology, Seoul National University, Gwanak-gu Gwanak-ro 1, Seoul 08826, Republic of Korea

<sup>3</sup>Department of Aerospace Engineering, Seoul National University, Gwanak-gu Gwanak-ro 1, Seoul 08826, Republic of Korea

<sup>4</sup>School of Integrated Circuit Science and Engineering, State Key Laboratory of Electronic Thin Films and Integrated Devices, University of Electronic Science and Technology of China, Chengdu 610054, China

**KEYWORDS:** Zinc–air batteries; Iron carbon; Triple doping; Carbon nanotubes; Oxygen reduction reaction.

## **S1. Preparation of different modified working electrodes (GCE, RDE, RRDE, NF and air cathodes)**

GCE, RDE, RRDE, NF and air cathodes were prepared with reference to the reports in the literatures[S1-S31] RDE, RRDE, GCE was first polished using alumina slurries (0.3 and 0.05 micron-sized), nickel foams and carbon clothes were consecutively acid washed, and then treated by successive ultrasonic cleaning using absolute deionized water, and ethanol. The activated electrodes were modified with the electrocatalysts ink dispersion. The  $4 \text{ mg}\cdot\text{mL}^{-1}$  electrocatalyst ink was used to drop-cast onto the electrodes surface. Accordingly, a mixture of 4 mg electrocatalyst powder, ethanol (300  $\mu\text{L}$ ), deionized water (650  $\mu\text{L}$ ), and 5 wt% Nafion solution (50  $\mu\text{L}$ ) was ultra-sonicated for 30 min. Hence, the electrocatalyst loading on electrode surface was controlled at  $0.0142 \text{ mg}/\text{cm}^2$  and essentially each modification was dried in air. All the experiments were demonstrated in KOH alkaline media, such as 0.1 M, 1M and 6M+0.5M ZnOAc for ORR, OER and ZAB respectively. In a typical procedure, all the calculations such as, Koutecky-Levich (K-L) for electron transfer number, hydrogen peroxide % calculation, and were mentioned in Supporting informations (S.I.) Herein, the glassy carbon electrodes (GCE) with  $d= 2.4 \text{ mm}$  was working electrode, and the carbon rod was counter electrode for OER and reference electrode (saturated mercury oxide electrode (Hg/HgO)) was same for both OER and ORR; in this, Pt/C and Fe<sub>SAs</sub>-PFN-CNTs modified nickel foam electrodes were used for OWS. Overall, intrinsic catalytic response, electro-kinetics, interference measurement, electron/mass transfer analysis and charging-discharging of the electrocatalysts were investigated using various electroanalytical techniques (Cyclic/linear sweep Voltammograms (CV/LSV), electrochemical impedance spectroscopy

(EIS), Chronoamperometric I-T test, open circuit potential (OCP) and chronopotentiometry (CP) and discussed in brief.

Crystallite domain size calculations

$$\text{Crystallite domain size} = (2.4 \times 10^{-10}) \frac{\lambda^4}{\left(\frac{I_D}{I_G}\right)}$$

Where,  $\lambda = 532$  nm (the laser wavelength), and ID/IG is the disorder degree of D and G bands.

## S2. Electrochemical characterizations

Electrochemical ORR measurements were carried out in O<sub>2</sub>- and N<sub>2</sub>-saturated 0.1 M KOH by using an electrochemical workstation (Pine, WaveDriver20) equipped with three electrodes. Wherein the catalyst-loaded rotating disc electrode (RDE, Pine, 5 mm; for CV, LSV, CSCA, CV cycling, *i-t*, and methanol poisoning) and a rotating-ring disc electrode (RRDE, Pine, N = 0.37; for electron transfer number and H<sub>2</sub>O<sub>2</sub> yield) were used as working electrodes, while the Hg/HgO electrode and Pt wire were used as the reference and counter electrodes, respectively.

Working electrodes were prepared by sonicating 5 mg of catalyst powder in 1 mL of mixed solvents ( $V_{\text{water}} : V_{\text{ethanol}} = 3: 1$ ) for 5 minutes. To which, 50  $\mu\text{L}$  of Nafion ink was injected and ultrasonicated for an additional 30 min. afterwards, 15  $\mu\text{L}$  of catalyst ink was loaded on RDE and RRDE. The loading amounts of all the catalysts, including 20 wt. % Pt/C for ORR, were 0.29 mg  $\text{cm}^{-2}$ . All measured potentials were corrected versus the reversible hydrogen electrode (RHE) using the Nernst equation ( $E_{\text{RHE}} = E_{(\text{Hg}/\text{HgO})} + 0.0591 \times \text{pH} + 0.098$ ). The cyclic voltammetry (CV) curves were detected from 0.2 to 1.0 V on RDE (50  $\text{mV s}^{-1}$ ). The linear sweep voltammetry (LSV) curves were investigated from 0.2 to 1.1 V (10  $\text{mV s}^{-1}$ , 400-2500 rpm). Cyclic step chronoamperometry (CSCA) was conducted to measure the solution resistance by adding an instantaneous 50 mV step

potential at 8 ms. The final LSV data was obtained by subtracting the background current measured in N<sub>2</sub>-saturated electrolyte and performing *iR* compensation using the CSCA results. The CV cycling tests were carried out from 0.6 to 1.0 V for continuous 3,000 cycles (100 mV s<sup>-1</sup>). The long-term durability experiments were executed by a chronoamperometry test on RDE at 0.6 V for 6 h (at 1600 rpm). Methanol tolerance tests were carried out by adding 20 mL of methanol to 90 mL of 0.1 M KOH electrolyte for FeSAs-PFN-CNTs, while 5 mL of methanol was added to 90 mL of 0.1 M KOH for commercial Pt/C.

The H<sub>2</sub>O<sub>2</sub> yield and ‘*n*’ were further detected on RRDE. The LSV was obtained from 1.1 to 0.1 V (5 mV s<sup>-1</sup>, 1600 rpm). And its ring potential was set at 1.3 V. Used the subsequent equations to calculate their specific values:

$$H_2O_2(\%) = 200 \times \frac{\frac{I_r}{N}}{I_d + \frac{I_r}{N}}$$

$$n = 4 \times \frac{I_d}{I_d + \frac{I_r}{N}}$$

Wherein, *I<sub>r</sub>*: ring current; *I<sub>d</sub>*: disk current; *N*: collection efficiency of the Pt ring (*N* = 0.37).

The Koutecky–Levich equation was provided to evaluate the values of electron transfer number (*n*).

$$\frac{1}{j} = \frac{1}{j_d} + \frac{1}{j_k} = \frac{1}{B\omega^{1/2}} + \frac{1}{j_k}$$

$$B = 0.2nFC_0D^{2/3}V^{-1/6}$$

Wherein, *j*: measured current density; *j<sub>k</sub>*: kinetic current density; *j<sub>d</sub>*: diffusion-limited current density; *ω*: the angular velocity of the disk (rad s<sup>-1</sup>); *F*: Faraday constant (96485 C mol<sup>-1</sup>); *C<sub>0</sub>*: bulk

concentration of O<sub>2</sub> ( $1.2 \times 10^{-6}$  mol cm<sup>-3</sup>);  $D_0$ : diffusion coefficient of O<sub>2</sub> in 0.1 M KOH ( $1.9 \times 10^{-5}$  cm<sup>2</sup> s<sup>-1</sup>);  $V$ : kinematic viscosity of the electrolyte (0.01 cm<sup>2</sup> s<sup>-1</sup>).

Similarly, the same catalyst ink was loaded (5  $\mu$ L) on a glassy carbon working electrode (GCE; 3 mm diameter) to evaluate the OER performance tests on a CHI 660D electrochemical workstation in 0.1 M KOH. The reference RuO<sub>2</sub> catalyst ink was also prepared in the same manner and loaded on polished GCE (5  $\mu$ L on 3 mm GCE; loading amount was 0.26 mg cm<sup>-2</sup>). Herein, the three-electrode system is assembled by a catalyst-loaded GCE working electrode, a graphite counter electrode, and a Hg/HgO reference electrode. LSV curves were acquired by scanning the potential from 0 to 0.8 V versus the Hg/HgO electrode with a scanning speed of 5 mV s<sup>-1</sup>. The electrochemical impedance spectroscopy (EIS) tests were performed from 0.1 to 100 kHz. CV cycling was carried out using catalysts modified GCE and the *i-t* tests were performed on nickel foam current collectors (2 cm x 1 cm; catalyst loading was 1 mg cm<sup>-2</sup>).

A Zn-O<sub>2</sub> battery was constructed in a 6 M KOH aqueous electrolyte consisting of 0.5 M Zn(Ac)<sub>2</sub> using a CHI 660D electrochemical workstation. Polished zinc sheet was used as a metal anode (thickness of 0.3 mm), and the bifunctional electrocatalyst-loaded carbon paper was employed as air cathode. Electrocatalyst ink preparation is the same as above, and the obtained homogeneous ink was loaded on carbon paper and dried in a 50 °C electric oven before assembling the Zn-air battery. While Pt/C-RuO<sub>2</sub> mixed catalyst ink was also prepared in the same method by dispersing 5 mg of both catalysts (1:1 wt.%) in a mixed solution of 750  $\mu$ L of water, 250  $\mu$ L of deionized water, and 50  $\mu$ L of Nafion ink by ultrasonication for 30 min. The homogenous ink was dropped onto the carbon paper, and the mass loading of the catalysts was 1.5 mg cm<sup>-2</sup>. All the electrochemical data of the as-prepared electrocatalysts presented in this article has been tested twice to make sure all the results are reliable and reproducible.

**Table S1: Bifunctional activity of FeSAs-PFN-CNTs performance and other compared transition-metal-based materials**

| Activities<br>Materials                          | $\eta@10 \text{ mA/cm}^2$ | Tafel slope<br>(mV/ dec) | Electrolyte      | Ref.             |
|--------------------------------------------------|---------------------------|--------------------------|------------------|------------------|
| Co <sub>9</sub> S <sub>8</sub> /CD@NSC           | 390 mV                    | 113                      | 1.0 M KOH        | S2               |
| Co, N, P-PCNS                                    | 319 mV                    | 91.1                     | 1.0 M KOH        | S19              |
| Co@CoO <sub>x</sub>                              | 289 mV                    | 68.9                     | 1.0 M KOH        | S20              |
| Co <sub>2</sub> P@NCNT                           | 470mV                     | 35.49                    | 1.0 M KOH        | S21              |
| Co@CoO <sub>x</sub> /N-C                         | 322 mV                    | 73.3                     | 1.0 M KOH        | S22              |
| SS-Co-SAC NSAs                                   | 348 mV                    | 94.2                     | 1.0 M KOH        | S23              |
| Co-Ni-Se/C                                       | 290 mV                    | 143                      | 1.0 M KOH        | S24              |
| Co@NCNTs                                         | 351 mV                    | 180.7                    | 1.0 M KOH        | S25              |
| NiSe <sub>2</sub> /C <sub>3</sub> N <sub>4</sub> | 300 mV                    | 58                       | 1.0 M KOH        | S26              |
| CoNi-OCNC                                        | 346 mV                    | 67                       | 1.0 M KOH        | S27              |
| FeSAs-PFN-CNTs                                   | <b>310 mV</b>             | <b>63.8</b>              | <b>1.0 M KOH</b> | <b>This work</b> |

**Table S2: ORR performance of Fe<sub>SAs</sub>-PFN-CNTs in comparison with few more synthesized catalysts in 0.1 M KOH solution.**

| <b>Activities</b><br><b>Materials</b> | <b><math>E_{\text{onset}}</math></b><br><b>(V)</b> | <b><math>E_{1/2}</math></b><br><b>(V)</b> | <b><math>J_a</math> at 0.6 V</b><br><b>(mA cm<sup>-2</sup>)</b> | <b><math>J_k</math> at 0.8 V</b><br><b>(mA cm<sup>-2</sup>)</b> |
|---------------------------------------|----------------------------------------------------|-------------------------------------------|-----------------------------------------------------------------|-----------------------------------------------------------------|
| PFN-CNT                               | 0.87                                               | 0.815                                     | 3.89                                                            | 2.4                                                             |
| Fe@P-CNT                              | 0.95                                               | 0.82                                      | 5.15                                                            | 9.6                                                             |
| Fe@N-CNT                              | 0.934                                              | 0.835                                     | 5.97                                                            | 36.3                                                            |
| Pt/C                                  | 0.957                                              | 0.828                                     | 5.21                                                            | 19.4                                                            |
| Fe <sub>SAs</sub> -PFN-CNTs           | 0.98                                               | 0.885                                     | 6.32                                                            | 144.2                                                           |

**Table S3:** ORR performance of FeSAs-PFN-CNTs in comparison with the other reported non-noble metal electrocatalysts.

| <b>Materials</b> \ <b>Activities</b>    | <b>Onset potential (V vs RHE)</b> | <b>Half-wave (E1/2) potential (V vs RHE)</b> | <i>Electrolyte</i> | <b>Ref.</b>      |
|-----------------------------------------|-----------------------------------|----------------------------------------------|--------------------|------------------|
| FC@NCs-4.15                             | 0.1 M KOH                         | 0.94                                         | 0.1 M KOH          | S1               |
| Co9S8/ CD@NSC                           | 0.933                             | 0.84 V                                       | 0.1 M KOH          | S2               |
| Fe-HNC                                  | 0.93                              | 0.85                                         | 0.1 M KOH          | S3               |
| Fe/Co @NC-WO <sub>2-x</sub>             | 0.93                              | 0.87                                         | 0.1 M KOH          | S4               |
| FeCo-N-HCN                              | 0.91                              | 0.86                                         | 0.1 M KOH          | S5               |
| Fe SAs@S/N-C                            | 0.96                              | 0.84                                         | 0.1 M KOH          | S6               |
| Fe-N-C-S                                | 0.99                              | 0.90                                         | 0.1 M KOH          | S7               |
| Fe-N/P-C-700                            | 0.941                             | 0.867                                        | 0.1 M KOH          | S8               |
| NPS-G-2                                 | 0.96                              | 0.85                                         | 0.1 M KOH          | S9               |
| Fe/OES                                  | 1.0                               | 0.85                                         | 0.1 M KOH          | S10              |
| CoFe-CB                                 | /                                 | 0.86                                         | 0.1 M KOH          | S11              |
| Fe@SNDC-950                             | 0.98                              | 0.83                                         | 0.1 M KOH          | S12              |
| NSCHCT1000                              | 1.02                              | 0.84                                         | 0.1 M KOH          | S13              |
| Fe-N-DSC                                | 1.03                              | 0.84                                         | 0.1 M KOH          | S14              |
| Co <sub>NP</sub> /Co <sub>SA</sub> -N-C | 0.95                              | 0.83                                         | 0.1 M KOH          | S15              |
| Co-N-PCNF                               | 0.95                              | 0.81                                         | 0.1 M KOH          | S16              |
| Fe-Co-N-C-900                           | 0.97                              | 0.86                                         | 0.1 M KOH          | S17              |
| Fe/Mn-NIHPC                             | 0.95                              | 0.86                                         | 0.1 M KOH          | S18              |
| <b>FeSAs-PFN-CNTs</b>                   | <b>0.98</b>                       | <b>0.885</b>                                 | <b>0.1 M KOH</b>   | <b>This work</b> |



**Table S4. Comparison of the performance of Fe<sub>SAs</sub>-PFN-CNTs based Zn-Air battery with other reported electrocatalysts.**

| Activities<br>Materials                   | Open-circuit<br>voltage (V) | Maximum<br>power density<br>(mW cm <sup>-2</sup> ) | Specific capacity<br>(mAh g <sup>-1</sup> ) @J<br>(mA cm <sup>-2</sup> ) | Ref.             |
|-------------------------------------------|-----------------------------|----------------------------------------------------|--------------------------------------------------------------------------|------------------|
| Co <sub>9</sub> S <sub>8</sub> /CD@NSC    | -                           | 92.7                                               | -                                                                        | S2               |
| Fe <sub>SAs</sub> @S/N-C                  | 1.51                        | 156                                                | 794@10                                                                   | S6               |
| Fe-N-C-S                                  | 1.49                        | 201                                                | 854@10                                                                   | S7               |
| Fe-N/P-C                                  | 1.42                        | 133.2                                              | 723.6@100                                                                | S8               |
| NPS-G-2                                   | 1.372                       | 151                                                | 686@10                                                                   | S9               |
| Fe/OES                                    | 1.5                         | 186.8                                              | 807.5@5                                                                  | S10              |
| FeCo/NC                                   | 1.472                       | 130                                                | 725.6@10                                                                 | S15              |
| Co,N,P-PCNS                               | 1.498                       | 101.3                                              | -                                                                        | S19              |
| FeCo@HOMNCP                               | 1.619                       | 134                                                | 786.5@10                                                                 | S28              |
| FeMn-DSAC                                 | 1.45                        | 181                                                | 734@2                                                                    | S29              |
| Co/Co <sub>9</sub> S <sub>8</sub> -NCL-30 | 1.485                       | 112                                                | 674@10                                                                   | S30              |
| Fe <sub>NP</sub> @Fe-N-C                  | 1.45                        | 106.5                                              | 711@10                                                                   | S31              |
| FeP/NPC-DNA                               | 1.394                       | 111.2                                              | 789.4@10                                                                 | S32              |
| NP-Co <sub>S</sub> ANC                    | 1.42                        | 158.1                                              | 768.4@20                                                                 | S33              |
| <b>Fe<sub>SAs</sub>-PFN-CNTs</b>          | <b>1.49</b>                 | <b>241</b>                                         | <b>781@20</b>                                                            | <b>This work</b> |

## S2. Characterizations

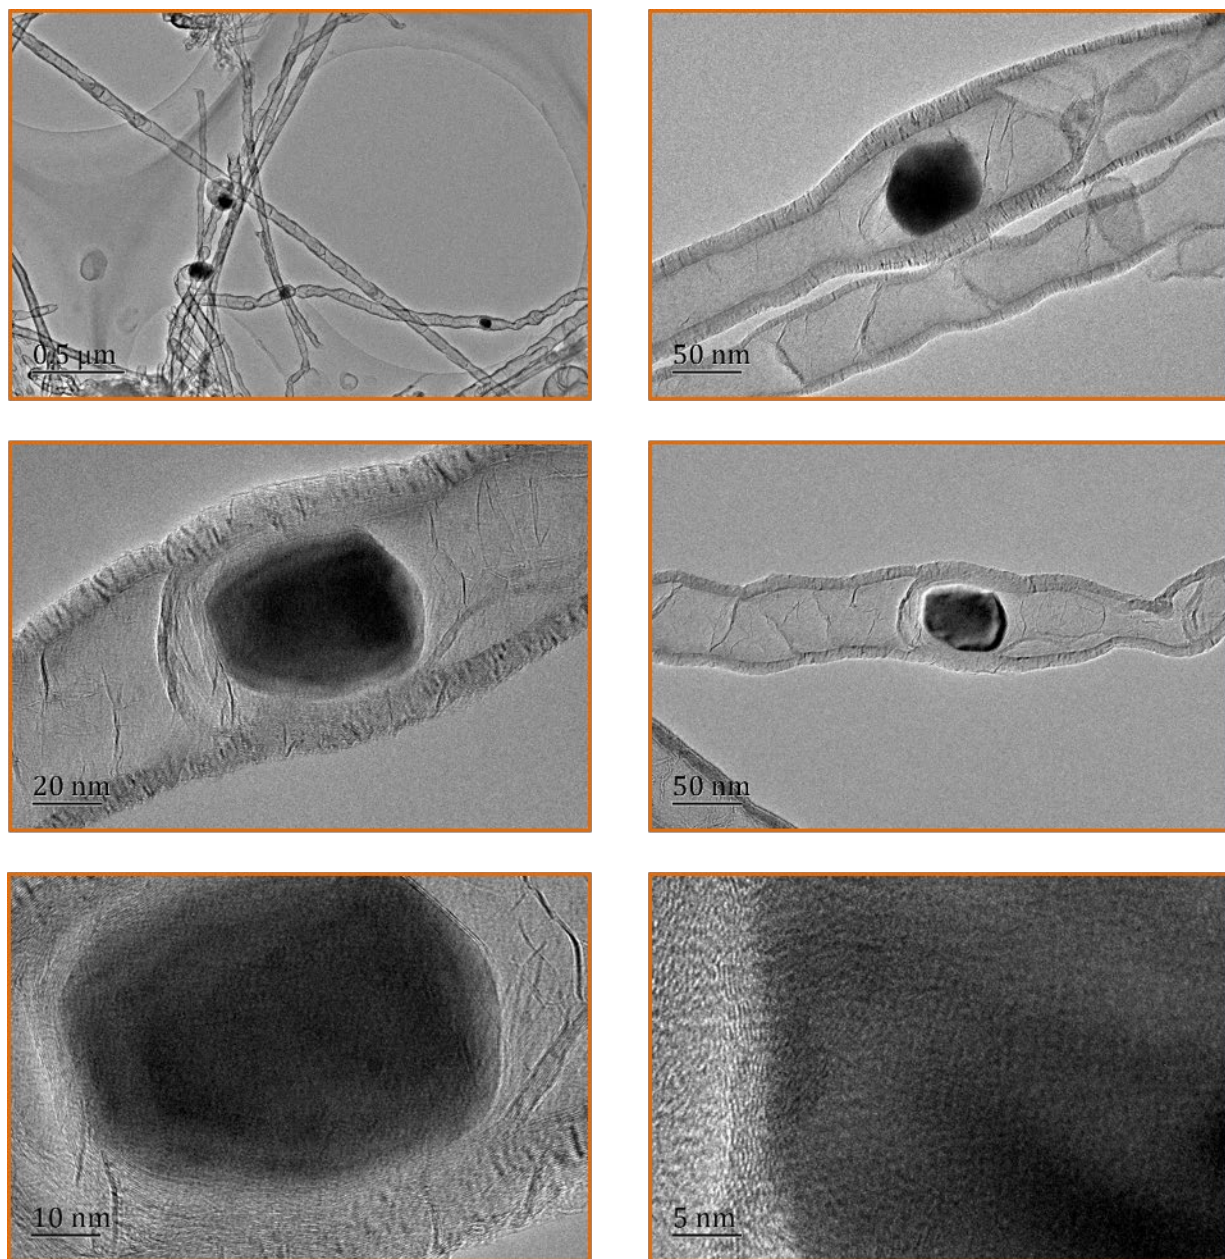

Fig S1. Additional HRTEM images

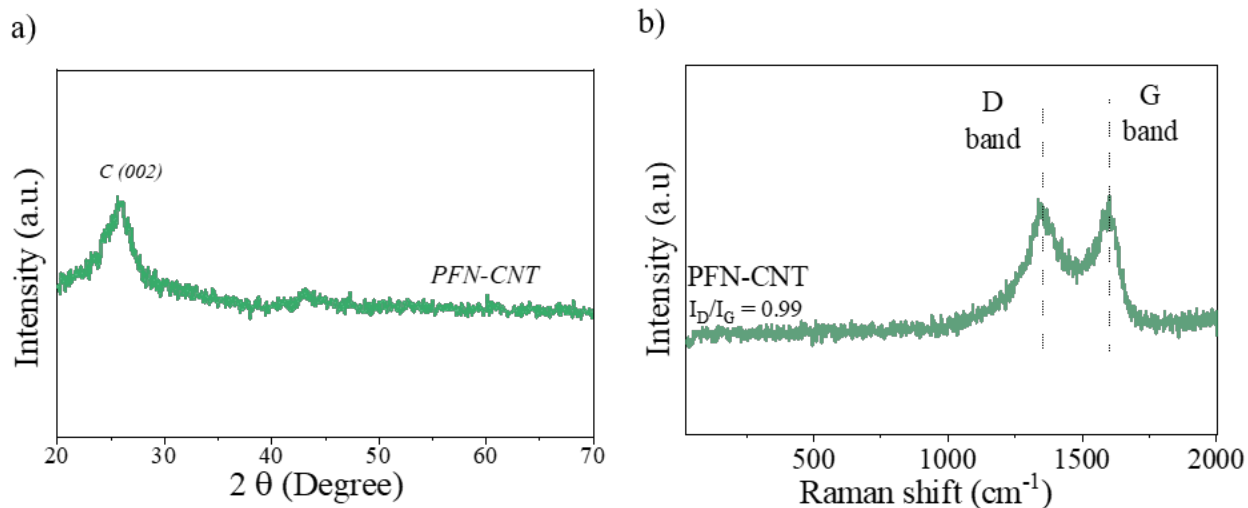

Fig. S2 XRD pattern of PFN-CNT, b) Raman spectrum of PFN-CNT

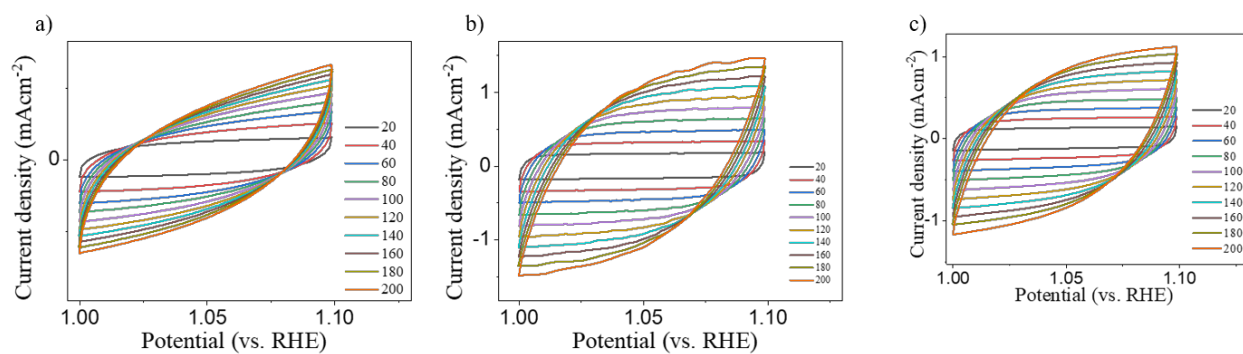

Fig. S3. (a-d) The plots of cyclic voltammograms operated in a non-Faradaic capacitive current range to estimate the ECSA in 0.1 M KOH electrolyte.

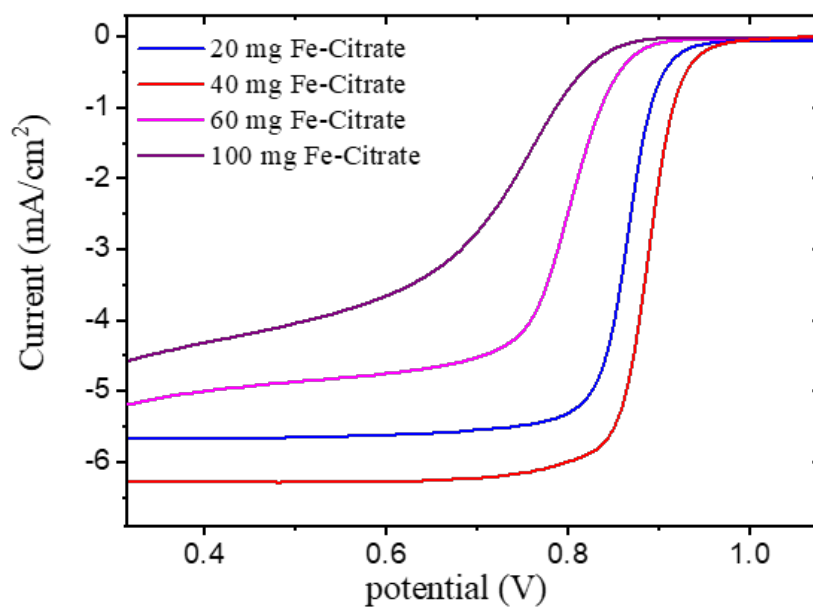

**Fig. S4.** LSV curves of FeSAs-PFN-CNTs with different iron citrate loading amount in presence of O<sub>2</sub> purging

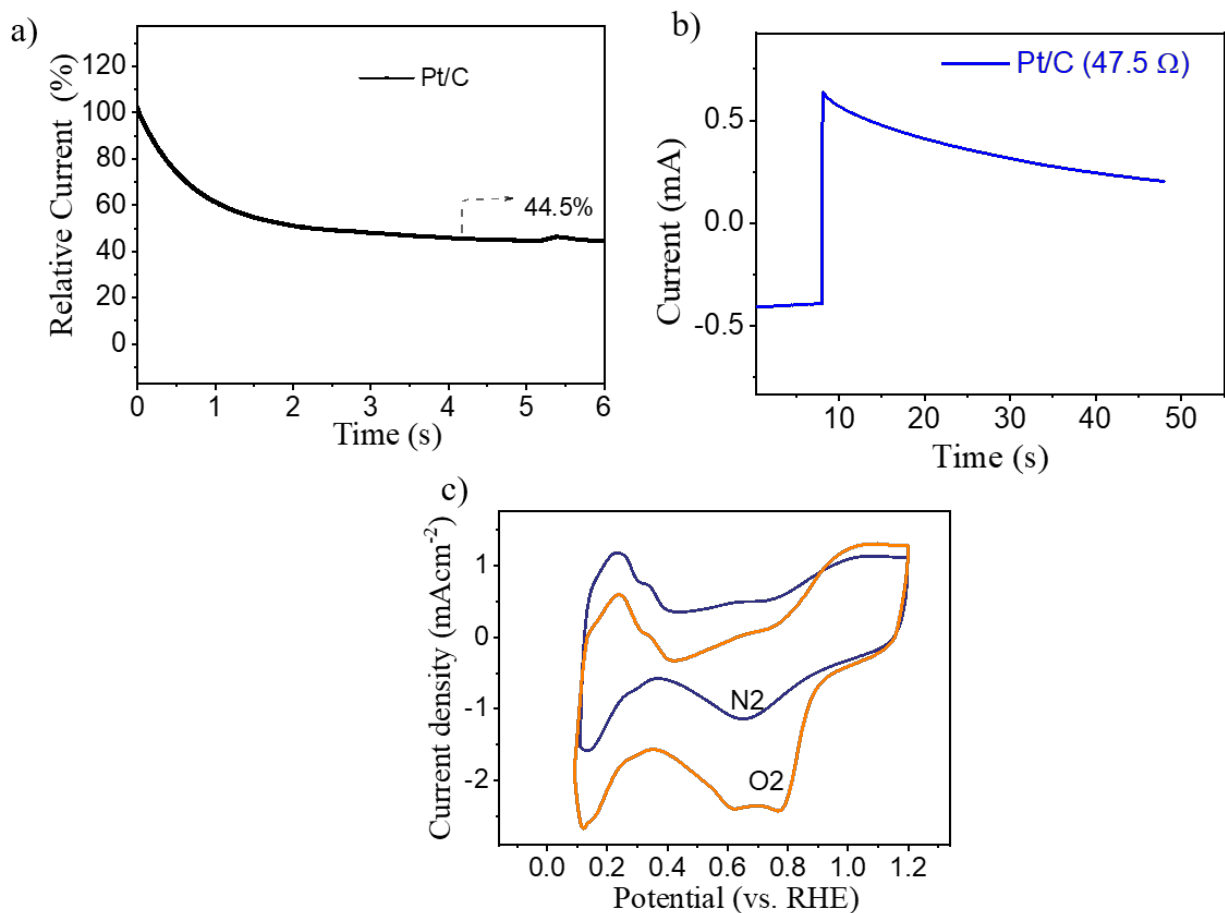

**Fig. S5.** I-T stability test and, b) CSCA plot obtained for Pt/C in  $\text{O}_2$ -saturated and c) CV plots obtained for commercial Pt/C in  $\text{N}_2$ - and  $\text{O}_2$ -saturated 0.1 M KOH.

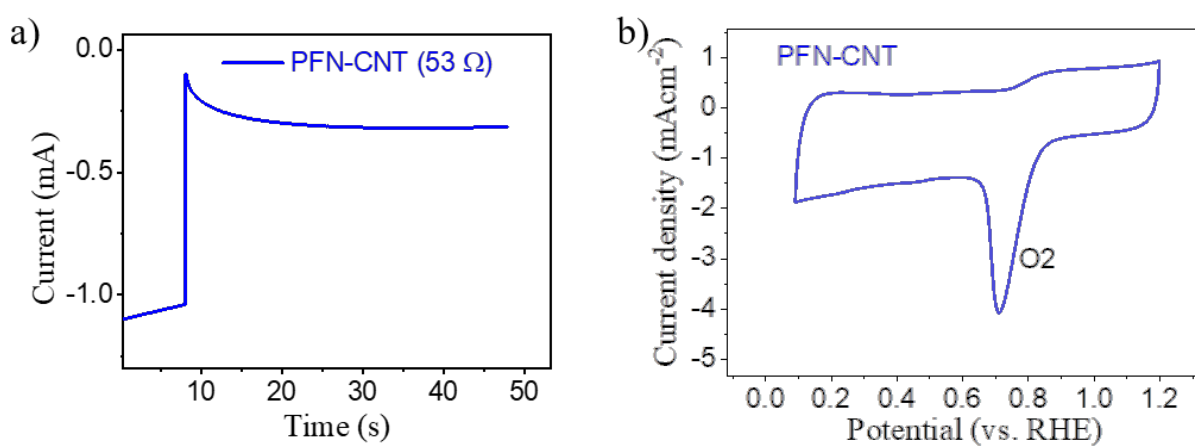

**Fig. S6.** (a) CSCA plot and (b) CV plot obtained for PFN-CNTs in  $\text{O}_2$ -saturated 0.1 M KOH.

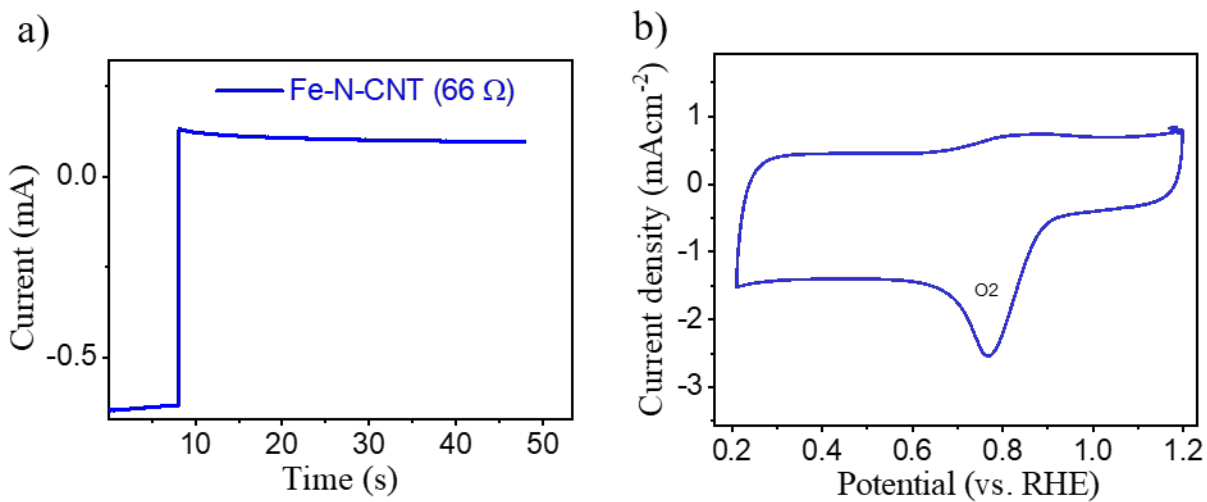

**Fig. S7.** (a) CSCA plot and (b) CV plot obtained for Fe-N-CNTs in O<sub>2</sub>-saturated 0.1 M KOH.

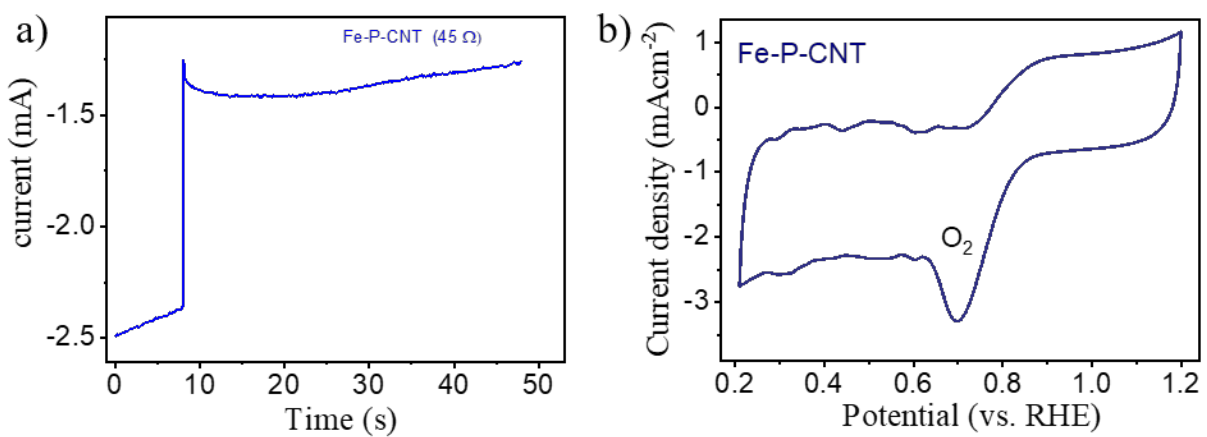

**Fig. S8.** (a) CSCA plot and (b) CV plot obtained for Fe-P-CNTs in O<sub>2</sub>-saturated 0.1 M KOH.

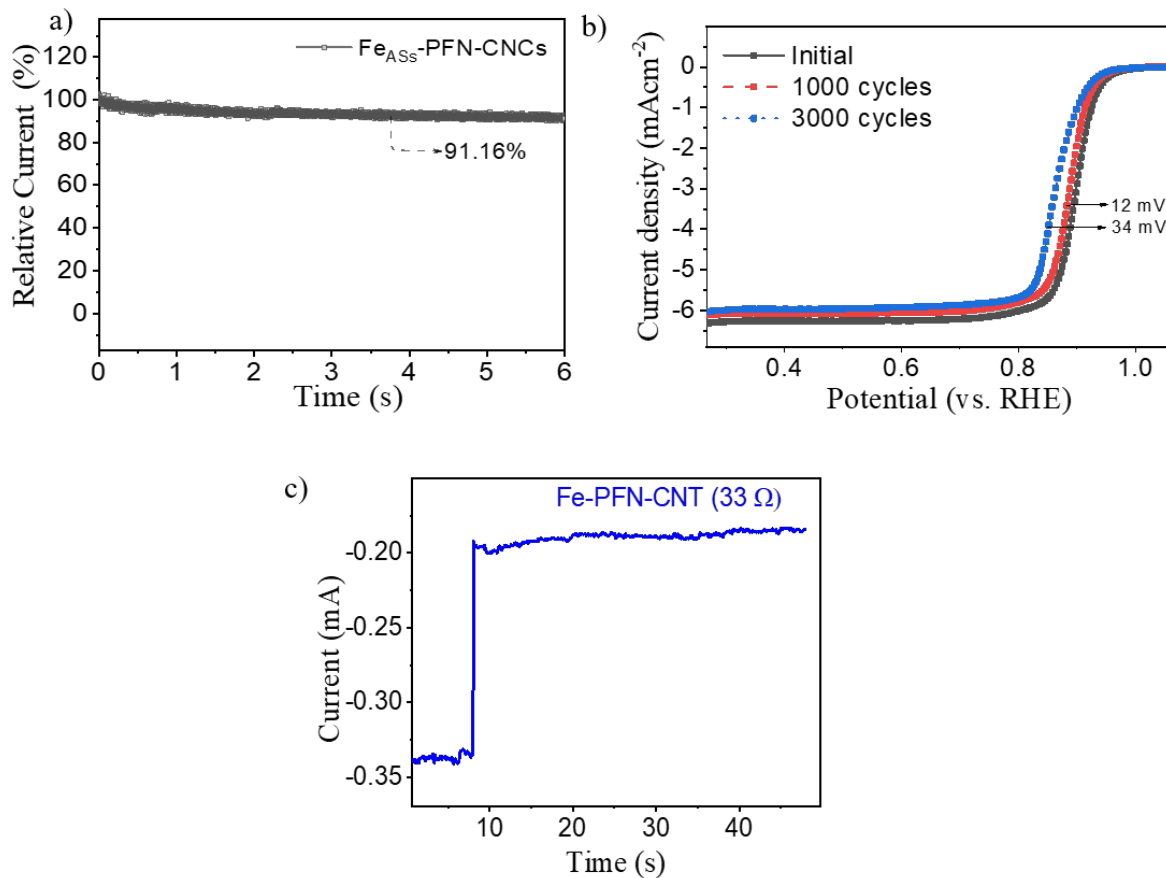

**Fig. S9.** (a) I-T stability test and (b) cycling stability obtained using LSV plot at initial and after 1000 and 3000 cycles, respectively and c) CCSA study of Fe<sub>SAs</sub>-PFN-CNTs in O<sub>2</sub>-saturated 0.1 M KOH.

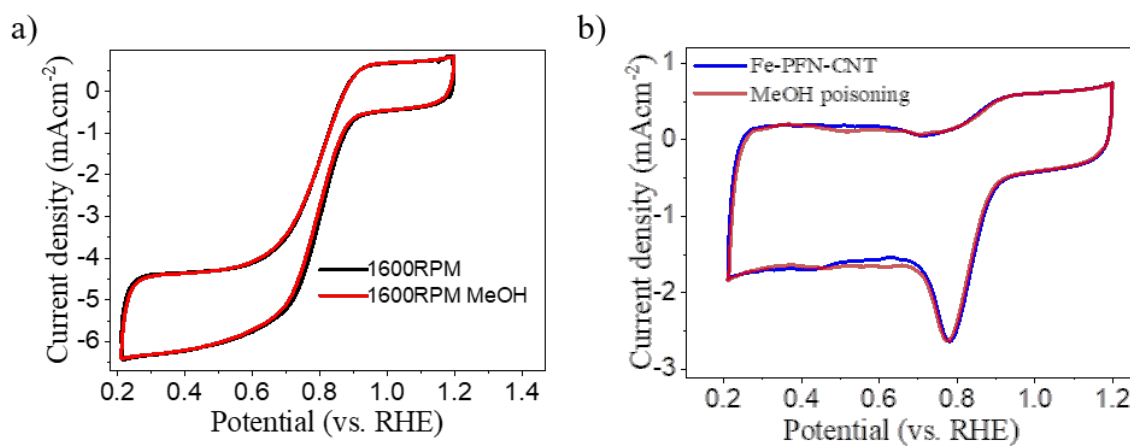

**Fig. S10.** (a) Methanol poisoning test obtained using CV plot for Fe<sub>SAs</sub>-PFN-CNTs in O<sub>2</sub>-saturated 0.1 M KOH in presence and absence of stirring a) 1600 rpm B) no stirring.

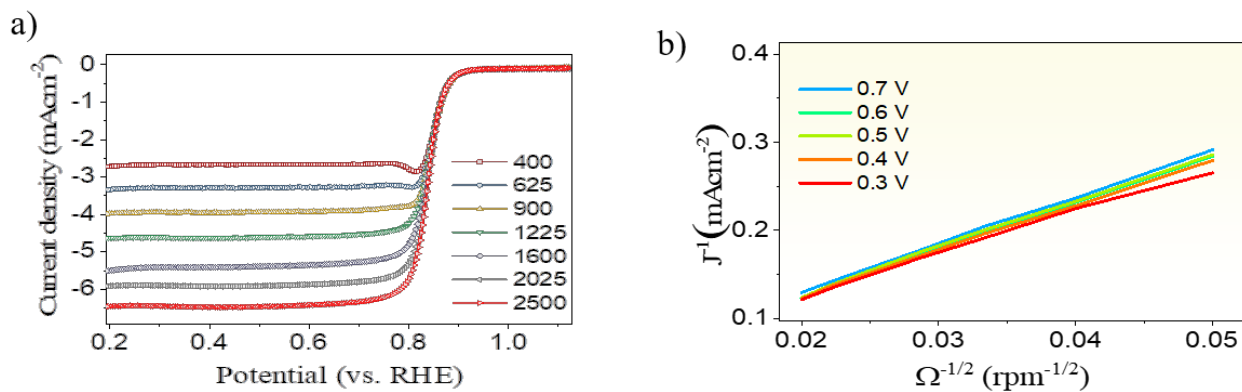

**Fig. S11.** (a) LSV plots obtained by varying the rotation speed from 400-2500 rotations per minute (RPM) for Fe-N-CNT, and (b) the corresponding Koutecky–Levich (K–L) plots.

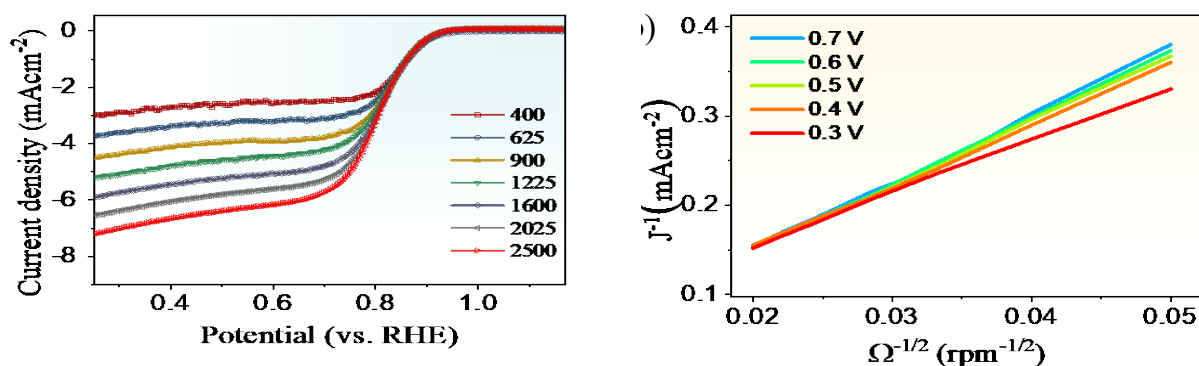

**Fig. S12.** (a) LSV plots obtained by varying the rotation speed from 400-2500 rotations per minute (RPM) for Fe-P-CNT, and (b) the corresponding Koutecky–Levich (K–L) plots.

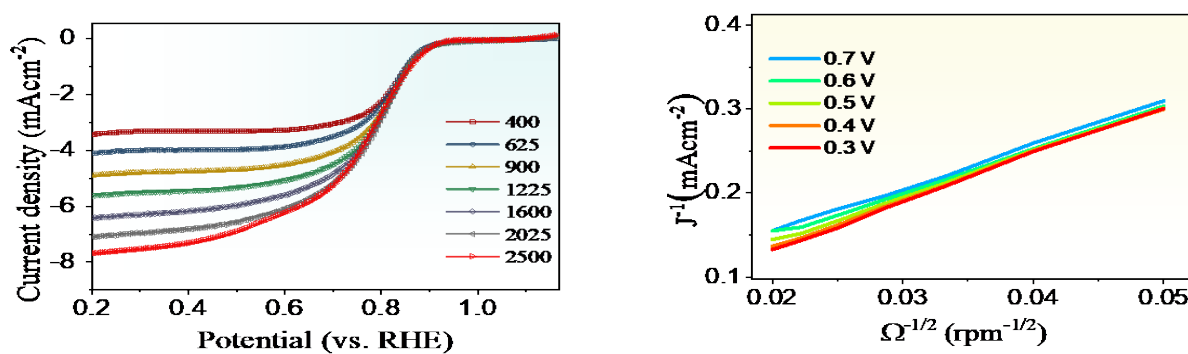

**Fig. S13.** (a) LSV plots obtained by varying the rotation speed from 400-2500 rotations per minute (RPM) for commercial Pt/C, and (b) the corresponding Koutecky–Levich (K–L) plots.

### S3. Computational details



All calculations are performed in the Vienna Ab-initio Simulation Package (VASP) using spin polarized density functional theory<sup>34</sup>. Projected Augmented Wave (PAW) method is used to describe the potentials of the atoms with Generalized Gradient Approximation (GGA) is considered for exchange and correlation effects at Perdew-Burke-Ernzerhof (PBE) level<sup>35</sup>. Grimme's correction is used with PBE for Van der Waal's correction<sup>36</sup>. Plane wave cut-off energy of 450 eV is used for the calculations.  $3 \times 1 \times 1$  K-point grid is used for the brillouin zone sampling with Monkhorst Pack scheme. Structural optimizations were done until the total energy converged less than  $10^{-5}$  eV per atom and the maximum force converged less than 0.02 eV/Å.

### S3.1. Modelling

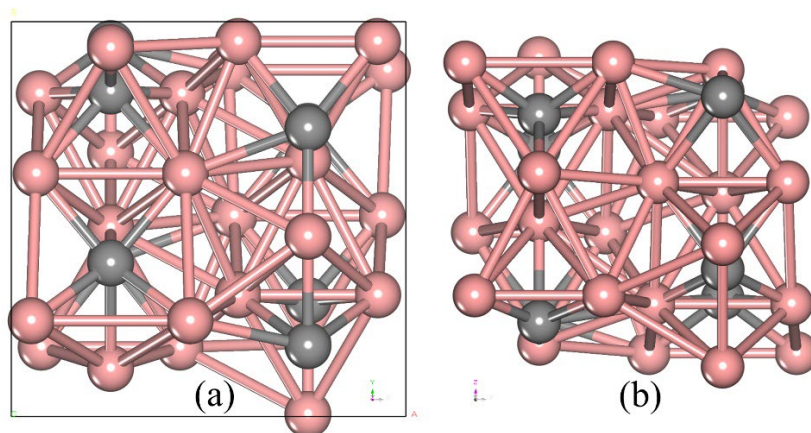

**Fig. S14.** Structure of Fe<sub>3</sub>C with (110) crystal face constructed on CNT for theoretical calculation in this work.

To construct the Fe active site model, a (8,8) carbon nanotube (CNT) was used in a  $1 \times 5$  supercell. The computational models were optimized with cell dimensions of  $a = 12.12$  Å,  $b = 24.187$  Å,  $c = 30$  Å, and lattice angles  $\alpha = \beta = \gamma = 90^\circ$ .

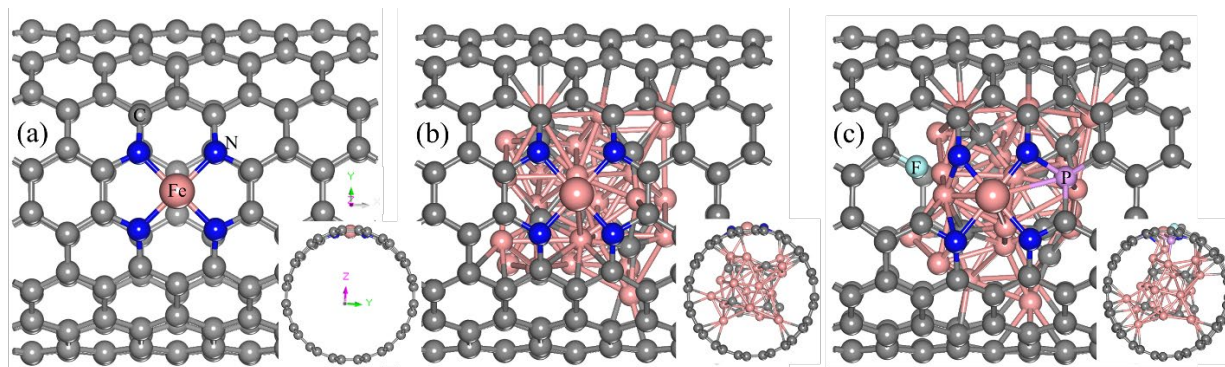

**Fig. S15.** Top and side view of an optimized structures of (a) Fe-N<sub>4</sub>CNT. (b) Fe<sub>3</sub>C-Fe-N<sub>4</sub>-CNT (Fe<sub>SAs</sub>-N-CNTs). (c) Fe<sub>3</sub>C-PF-Fe-N<sub>4</sub>-CNT (Fe<sub>SAs</sub>-PFN-CNTs).

A vacuum of 15 Å was introduced along the z-axis to prevent any unintended interactions between the periodic images. Three distinct configurations were considered: (i) FeN<sub>4</sub> supported on carbon nanotubes (Fe-N<sub>4</sub>CNT), (ii) Fe<sub>3</sub>C embedded in the CNT structure with its (110) lattice plane (see Fig.S14) exposed to FeN<sub>4</sub> active sites (Fe<sub>SAS</sub>-N-CNTs), and (iii) a similar Fe<sub>3</sub>C insertion with phosphorus (P) and fluorine (F) dopants in the FeN<sub>4</sub>-CNT matrix (Fe<sub>SAS</sub>-PFN-CNTs). Optimized structures for each configuration are illustrated in Fig. 15a-c, 16.

### S3.2. Steps for Oxygen Evolution Reaction (OER):

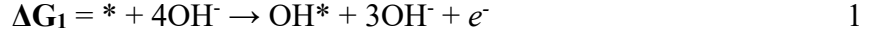

Surface reacts with hydroxide ions to form surface-bound hydroxyl species (OH) and releases one electron.

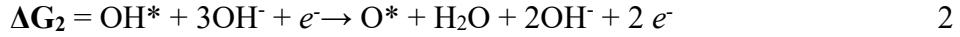

Surface-bound OH\* reacts, releasing water and forming surface-bound oxygen (O\*).

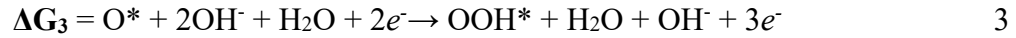

O\* reacts with hydroxide ions to form surface-bound peroxide species (OOH\*).

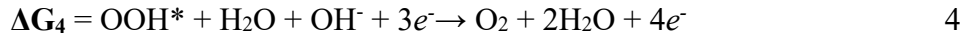

OOH\* releases oxygen gas (O<sub>2</sub>) and additional water.

### S3.3. Steps for Oxygen Reduction Reaction (ORR):

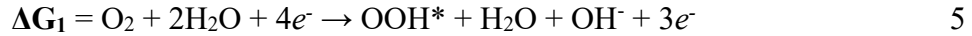

Oxygen gas reacts with water to form surface-bound peroxide (OOH\*).

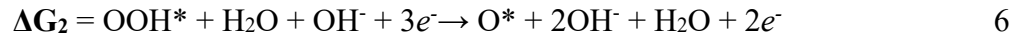

Surface-bound peroxide reacts to form surface-bound oxygen (O\*).

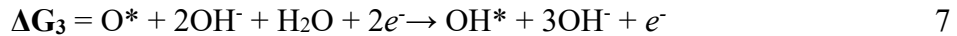

Surface-bound oxygen reacts to form surface-bound hydroxyl (OH\*).

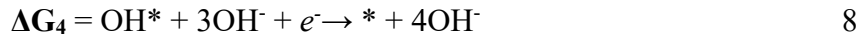

Surface-bound hydroxyl returns to the initial state, completing the ORR cycle.

Free energy difference  $\Delta G$  is calculated by following <sup>37</sup>,

$$\Delta G = \Delta E_{\text{DFT}} + \Delta \text{ZPE} - T\Delta S - neU$$

9

\* denotes the active site on a surface, while molecules marked with \* represent those in an adsorbed state. The terms  $E_{\text{DFT}}$  and ZPE refer to the total energy from DFT calculations and the zero-point energy of free molecules, respectively. The variables TS, n, and U represent the entropy obtained from vibrational frequency calculations, the number of electrons transferred, and the applied potential on the electrode, respectively. At the equilibrium potential of  $U = 0.4$  V, the potential-determining step (PDS) is the one with the highest uphill energy difference in the free energy profile, from which the overpotential ( $\eta$ ) is calculated for the active site. A lower overpotential indicates a more efficient site.

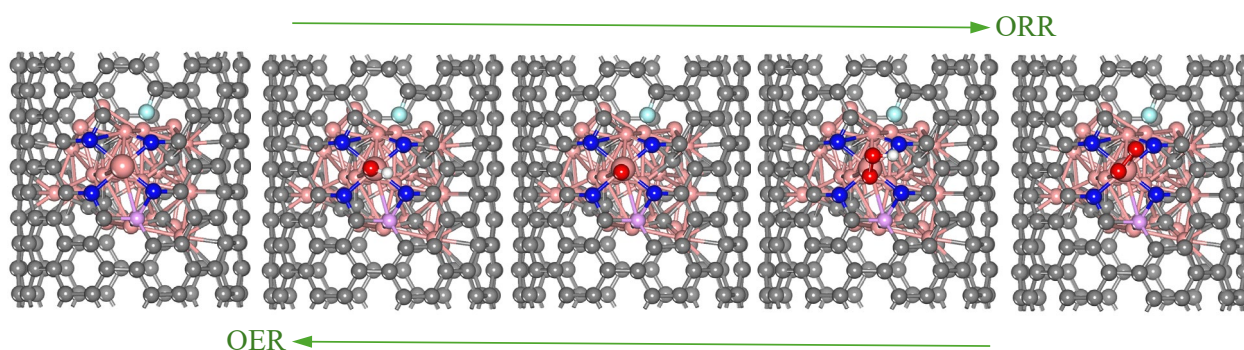

**Fig. S16.** Optimized structures of the ORR and OER intermediates on  $\text{FeSAs-PFN-CNTs}$ .

### S3.4. *d*-band center

The *d*-band center is calculated using formula

$$d\text{-band center} = \frac{\int_{-\infty}^0 \rho_d E dE}{\int_{-\infty}^0 \rho_d dE} \quad 10$$

Here,  $\rho$  is depicted as the density of *d* and  $E$  is depicted as the energy eigen value.

## S4. DFT studies: Results and discussion

First-principles Density Functional Theory (DFT) calculations were carried out to investigate the roles of phosphorus (P), iron (Fe), and iron carbide ( $\text{Fe}_3\text{C}$ ) species in enhancing the bifunctional oxygen reduction reaction (ORR) and oxygen evolution reaction (OER) activities within the  $\text{Fe-N}_4\text{-CNT}$  structure. It is widely recognized that transition metal centers in single-atom catalysts (SACs) often exhibit strong binding to  $\text{O}_2$  molecules, coupled with high energy barriers for the four-electron ORR and OER processes. This results in suboptimal bifunctional catalytic activity. However, based on electrocatalytic experiments, it was anticipated that the introduction of  $\text{Fe}_3\text{C}$  at the interface would reduce the energy barriers for both ORR and OER on  $\text{FeSAs-PFN-CNTs}$  active sites, potentially improving their overall performance.

The *d*-band center, a key descriptor for the catalytic activity of metal atoms, was calculated using eq 10<sup>38,39</sup>. In comparison to the Fe-N<sub>4</sub>-CNT system, where the *d*-band center of Fe is -2.63 eV, the values shift upward to -2.12 eV in the Fe<sub>SAs</sub>-N-CNTs system and -2.31 eV in the Fe<sub>SAs</sub>-PFN-CNTs system (**Fig. S17**). This shift indicates that the incorporation of Fe<sub>3</sub>C, along with phosphorus (P) and fluorine (F) dopants, modifies the electronic structure of the Fe atoms, promoting more favourable O<sub>2</sub> adsorption and thereby enhancing bifunctional catalytic activity.

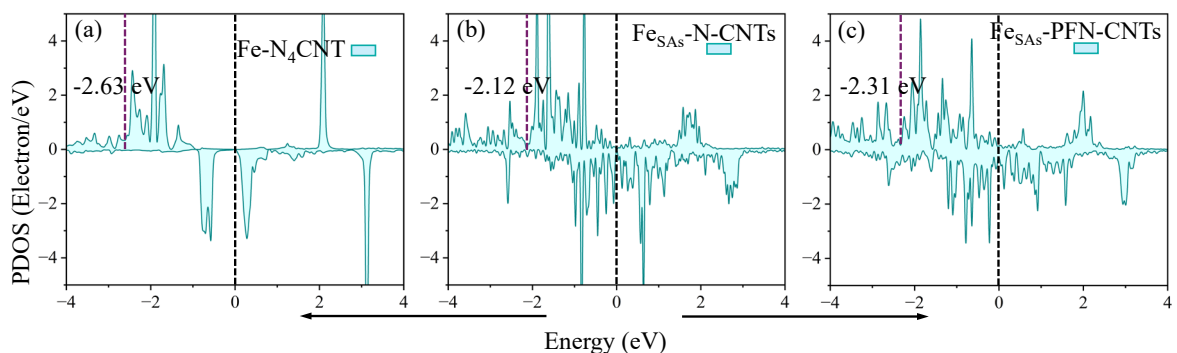

**Fig. S17.** Projected density of states (PDOS) of Fe *d*-band in (a) Fe-N<sub>4</sub>-CNT (b) Fe<sub>3</sub>C-Fe-N<sub>4</sub>-CNT (Fe<sub>SAs</sub>-N-CNTs) and (c) Fe<sub>3</sub>C-PF-Fe-N<sub>4</sub>-CNT (Fe<sub>SAs</sub>-PFN-CNTs).

From the **Fig. S18**, the O<sub>2</sub>→\*OOH step in Fe-N<sub>4</sub>-CNT requires overcoming a 0.19 eV energy barrier, which hinders smooth oxygen activation. Similarly, the \*OH→\*O step in OER requires a higher energy barrier of 0.86 eV. Upon integrating Fe<sub>3</sub>C into the Fe-N<sub>4</sub>-CNT, the ORR barrier is significantly reduced to 0.02 eV, improving the ORR activity. However, the OER step requires a much higher energy barrier of 1.18 eV, indicating a less favorable condition for OER activity. In contrast, when Fe<sub>3</sub>C is integrated into the Fe<sub>SAs</sub>-PFN-CNTs structure, the ORR and OER performance becomes more balanced. The ORR energy barrier is lowered to 0.11 eV, and the OER barrier is reduced to 0.53 eV, making it more optimal for dual-function catalytic activity. These findings highlight that Fe<sub>3</sub>C, P and F integration can significantly enhance the ORR/OER performance of single-atom Fe-based catalysts, especially in improving both ORR and OER activities.

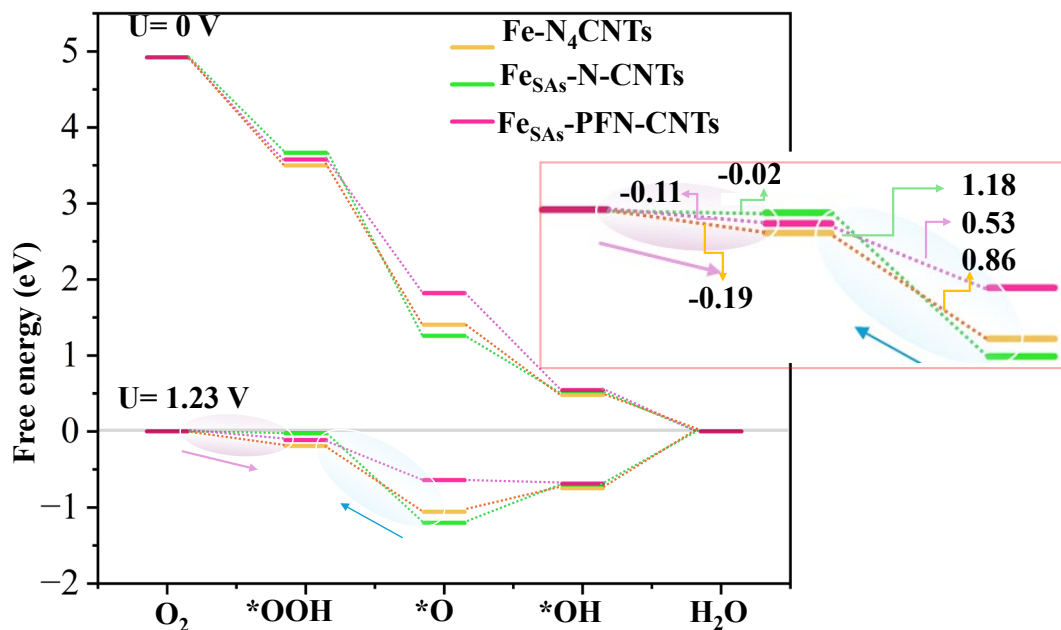

**Fig. S18.** Gibbs free energy changes of ORR and OER on Fe-N<sub>4</sub>-CNT, Fe<sub>3</sub>C-Fe-N<sub>4</sub>-CNT and Fe<sub>3</sub>C-PF-Fe-N<sub>4</sub>-CNT.

To understand these changes in the energy barrier, we studied the bader charge calculations. **Fig. S19** shows the Bader charge transfer analysis for three systems, Fe-N<sub>4</sub>CNT, Fe<sub>SAs</sub>-N-CNTs and Fe<sub>SAs</sub>-PFN-CNTs systems. The bader charge for Fe in the Fe<sub>SAs</sub>-PFN-CNTs, the electron-rich Fe<sub>3</sub>C serves as an electron donor, transferring 0.066 (see **Fig. S19a**) electrons to the electron-withdrawing Fe-N<sub>4</sub>-CNT site which is agrees with previous report<sup>40</sup>. This electron donation results in a decrease in the Fe (+ve) charge value from 0.948 to 0.882e. In case of Fe<sub>SAs</sub>-PFN-CNTs, the charge transfer is 0.141e (see **Fig. S19b**). This electron donation results in a decrease in the Fe (+ve) charge value from 1.092e to 0.951e. Hence, Upon incorporating PF into the Fe-N<sub>4</sub>-CNT system, our calculations reveal an increase in the Fe charge value to 1.092e, indicating that P and F functions as an electron donor (0.073e) and acceptor (0.217), from the Fe center (see **Fig. S19c**). When both P and F and Fe<sub>3</sub>C are introduced into the Fe-N<sub>4</sub>-CNT system, the charge on the Fe site stabilizes at 0.95e, suggesting a compensatory effect between the electron-donating Fe<sub>3</sub>C and the electron-accepting P and F. This dual modulation of charge density-electron donation from Fe<sub>3</sub>C and electron withdrawal by P and F-likely plays a crucial role in regulating the adsorption and desorption of oxygen-related intermediates on the Fe-N<sub>4</sub>CNT catalytic sites. This modulation enhances the catalytic efficiency by facilitating reversible ORR and OER, making the system a promising candidate for applications in energy conversion technologies.

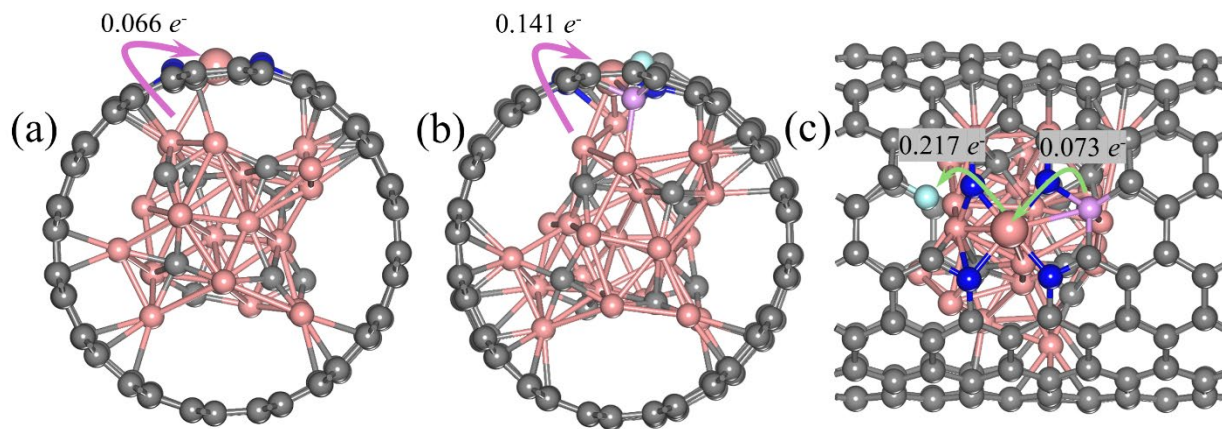

**Fig. S19.** Bader charge transfer analysis for  $e^-$  transfer in the (a)  $\text{Fe}_3\text{C-Fe-N}_4\text{-C}$ , (b) side and (c) top view of  $\text{Fe}_3\text{C-PF-Fe-N-C}$  system.

## References

1. X. Luo, H. Ma, H. Ren, X. Zou, Y. Wang, X. Li, Z. Shen, Y. Wang, L. Cui, Controllable synthesis of nitrogen-doped carbon containing Co and Co<sub>3</sub>Fe<sub>7</sub> nanoparticles as effective catalysts for electrochemical oxygen conversion, *J. Colloid Interface Sci.* 590 (2021) 622-631, <https://doi.org/10.1016/j.jcis.2021.01.097>.
2. Zhang, P.; Bin, D.; Wei, J.-S.; Niu, X.-Q.; Chen, X.-B.; Xia, Y.-Y.; Xiong, H.-M. Efficient Oxygen Electrocatalyst for Zn–Air Batteries: Carbon Dots and Co<sub>9</sub>S<sub>8</sub> Nanoparticles in a N,S-Codoped Carbon Matrix. *ACS Applied Materials & Interfaces* 2019, 11 (15), 14085. DOI: 10.1021/acsami.8b22557
3. X. Zhang, S. Zhang, Y. Yang, L. Wang, Z. Mu, H. Zhu, X. Zhu, H. Xing, H. Xia, B. Huang, J. Li, S. Guo, E. Wang, A General Method for Transition Metal Single Atoms Anchored on Honeycomb-Like Nitrogen-Doped Carbon Nanosheets, *Adv. Mater.* 32 (2020) 1906905, <https://doi.org/10.1002/adma.201906905>
4. Q. Han, X. Zhao, Y. Luo, L. Wu, S. Sun, J. Li, Y. Wang, G. Liu, Z. Chen, Synergistic Binary Fe-Co Nanocluster Supported on Defective Tungsten Oxide as Efficient Oxygen Reduction Electrocatalyst in Zinc-Air Battery, *Adv. Sci.* 9 (2022) 2104237, <https://doi.org/10.1002/advs.202104237>.
5. H.X. Li, Y.L. Wen, M. Jiang, Y. Yao, H.H. Zhou, Z.Y. Huang, J.W. Li, S.Q. Jiao, Y.F. Kuang, S.L. Luo, Understanding of Neighboring Fe-N<sub>4</sub>-C and Co-N<sub>4</sub>-C Dual Active Centers for Oxygen Reduction Reaction, *Adv. Funct. Mater.* 31 (2021) 2011289, <https://doi.org/10.1002/adfm.202011289>.
6. Yang, T.; Ge, B.; Liu, X.; Zhang, Z.; Chen, Y.; Liu, Y. Boosting Electrocatalytic Activity of Single Atom Iron Catalysts through Sulfur-Doping Engineering for Liquid and Flexible Rechargeable Zn-air Batteries. *Journal of Materials Chemistry A* 2024, DOI:10.1039/d4ta00524d 10.1039/d4ta00524d.
7. Wang, K.; Zhang, X.; Xiang, X.; Wang, Y.; Lyu, D.; Xi, S.; Tian, Z. Q. In Situ S-Doping Strategy of Promoting Iron Coordinated by Nitrogen-Doped Carbon Nanosheets for Efficient Oxygen Reduction Reaction. *ACS Applied Materials & Interfaces* 2022, 14 (41), 46548.
8. Yuan, K.; Lützenkirchen-Hecht, D.; Li, L.; Shuai, L.; Li, Y.; Cao, R.; Qiu, M.; Zhuang, X.; Leung, M. K. H.; Chen, Y. et al. Boosting Oxygen Reduction of Single Iron Active Sites

via Geometric and Electronic Engineering: Nitrogen and Phosphorus Dual Coordination. *Journal of the American Chemical Society* 2020, 142 (5), 2404. <https://doi.org/10.1021/jacs.9b11852>.

9. Zheng, X.; Wu, J.; Cao, X.; Abbott, J.; Jin, C.; Wang, H.; Strasser, P.; Yang, R.; Chen, X.; Wu, G. N-, P-, and S-doped graphene-like carbon catalysts derived from onium salts with enhanced oxygen chemisorption for Zn-air battery cathodes. *Applied Catalysis B: Environmental* 2019, 241, 442.
10. C.C. Hou, L. Zou, L. Sun, K. Zhang, Z. Liu, Y. Li, C. Li, R. Zou, J. Yu, Q. Xu, Single-Atom Iron Catalysts on Overhang-Eave Carbon Cages for High-Performance Oxygen Reduction Reaction, *Angew Chem. Int. Ed.* 59 (2020) 7384-7389, <https://doi.org/10.1002/anie.202002665>.
11. W. Zhu, Y. Pei, J.C. Douglin, J. Zhang, H. Zhao, J. Xue, Q. Wang, R. Li, Y. Qin, Y. Yin, D.R. Dekel, M.D. Guiver, Multi-scale study on bifunctional Co/Fe-N-C cathode catalyst layers with high active site density for the oxygen reduction reaction, *Appl. Catal. B* 299 (2021) 120656, <https://doi.org/10.1016/j.apcatb.2021.120656>.
12. Choudhury, F. A.; Norouzi, N.; Amir, K.; Demir, M.; El-Kaderi, H. M. Iron-based sulfur and nitrogen dual doped porous carbon as durable electrocatalysts for oxygen reduction reaction. *International Journal of Hydrogen Energy* 2022, 47 (9), 6078. <https://doi.org/10.1016/j.ijhydene.2021.12.020>
13. Z. Li, Y. Yao, Y. Niu, W. Zhang, B. Chen, X. Zeng, J. Zou, Multi-heteroatom-doped hollow carbon tubes as robust electrocatalysts for the oxygen reduction reaction, oxygen and hydrogen evolution reaction, *Chem. Eng. J.* 418 (2021) 129321, <https://doi.org/10.1016/j.cej.2021.129321>
14. Z. Huang, H. Pan, W. Yang, H. Zhou, N. Gao, C. Fu, S. Li, H. Li, Y. Kuang, In Situ Self-Template Synthesis of Fe-N-Doped Double-Shelled Hollow Carbon Microspheres for Oxygen Reduction Reaction, *ACS Nano* 12 (2018) 208-216, <https://doi.org/10.1021/acsnano.7b05832>.
15. X. Cheng, J. Yang, W. Yan, Y. Han, X. Qu, S. Yin, C. Chen, R. Ji, Y. Li, G. Li, G. Li, Y. Jiang, S. Sun, Nano-geometric deformation and synergistic Co nanoparticles Co-N<sub>4</sub> composite sites for proton exchange membrane fuel cells, *Energy Environ. Sci.* 14 (2021) 5958-5967, <https://doi.org/10.1039/d1ee01715b>.



16. Y. He, H. Guo, S. Hwang, X. Yang, Z. He, J. Braaten, S. Karakalos, W. Shan, M. Wang, H. Zhou, Z. Feng, K.L. More, G. Wang, D. Su, D.A. Cullen, L. Fei, S. Litster, G. Wu, Single Cobalt Sites Dispersed in Hierarchically Porous Nanofiber Networks for Durable and High-Power PGM-Free Cathodes in Fuel Cells, *Adv. Mater.* 32 (2020) 2003577, <https://doi.org/10.1002/adma.202003577>.
17. X.L. Chen, J.W. Huang, Y.C. Huang, J. Du, Y.F. Jiang, Y. Zhao, H.B. Zhu, Efficient Fe-Co-N-C Electrocatalyst Towards Oxygen Reduction Derived from a Cationic Co-II-based Metal-Organic Framework Modified by Anion-Exchange with Potassium Ferricyanide, *Chem.-Asian J.* 14 (2019) 995-1003, <https://doi.org/10.1002/asia.201801776>.
18. S. Song, Y. Wang, P. Tian, J. Zang, One-step complexation and self-template strategy to synthesis bimetal Fe/Mn-N doped interconnected hierarchical porous carbon for enhancing catalytic oxygen reduction reaction, *Int. J. Hydrogen Energy* 47 (2022) 24728-24737, <https://doi.org/10.1016/j.ijhydene.2022.05.218>.
19. Niu, H.-J.; Wang, A.-J.; Zhang, L.; Feng, J.-J. Bioinspired One-Step Pyrolysis Fabrication of 3D Porous Co, N, P-doped Carbon Nanosheets with Enriched CoN<sub>x</sub> Active Sites as High-Performance Bifunctional Oxygen Electrocatalyst for Rechargeable Zn–Air Battery. *ACS Applied Energy Materials* 2020, 3 (3), 2781.
20. Jing Qi, Wei Zhang, Rui Cao, Aligned cobalt-based Co@CoO<sub>x</sub> nanostructures for efficient electrocatalytic water oxidation, *Chem. Commun.*, 2017, 53, 9277-9280.
21. Peng, X.; Xian, X.; Han, L.; Liu, Y.; Zheng, P.; Fu, Y.; Dong, P.; Zeng, X.; Zhang, Y. Co<sub>2</sub>P Nanoparticles Encapsulated in N-Doped Carbon Nanotubes as a Bifunctional Oxygen Catalyst for a High-Performance Rechargeable Zn–Air Battery. *ACS Applied Nano Materials* 2023, 6 (3), 2027.
22. X. Wen, X. Yang, M. Li, L. Bai, J. Guan, Co/CoO<sub>x</sub> nanoparticles inlaid onto nitrogen-doped carbon-graphene as a trifunctional electrocatalyst, *Electrochim. Acta* 296 (2019) 830-841
23. Xie, W.; Song, Y.; Li, S.; Li, J.; Yang, Y.; Liu, W.; Shao, M.; Wei, M. Single-Atomic-Co Electrocatalysts with Self-Supported Architecture toward Oxygen-Involved Reaction. *Advanced Functional Materials* 2019, 29 (50).
24. F. Ming, H. Liang, H. Shi, X. Xu, G. Mei, Z. Wang, MOF-derived Co-doped nickel selenide/C electrocatalysts supported on Ni foam for overall water splitting, *J. Mater.*

Chem. A, 2016, 4, 15148–15155

25. Ye, D.; Shen, Y.; Mao, H.; Liang, Y.; Gao, Q.; Yang, S.; Zhang, S.; Cai, X.; Fang, Y. Dual-sources directed construction of N-doped carbon nanotube arrays as superior Self-supported bifunctional air electrodes for Rechargeable/Flexible Zinc-air batteries. *Chemical Engineering Journal* 2023, 464.
26. S. Wang, P. He, L. Jia, M. He, T. Zhang, F. Dong, M. Liu, H. Liu, Y. Zhang, C. Li, J. Gao, L. Bian, Nanocoral-like composite of nickel selenide nanoparticles anchored on two-dimensional multi-layered graphitic carbon nitride: A highly efficient electrocatalyst for oxygen evolution reaction, *Appl. Cat. B: Environ.* 243 (2019) 463-469
27. Lu, M.; Yang, X.; Li, Y.; Zhu, Z.; Wu, Y.; Xu, H.; Gao, J.; Yao, J. Modulating the Electronic Structure of Porous Nanocubes Derived from Trimetallic Metal–Organic Frameworks to Boost Oxygen Evolution Reaction Performance. *Chemistry – An Asian Journal* 2019, 14 (19), 3357
28. W. Li, B. Liu, D. Liu, P. Guo, J. Liu, R. Wang, Y. Guo, X. Tu, H. Pan, D. Sun, F. Fang, R. Wu, Alloying Co Species into Ordered and Interconnected Macroporous Carbon Polyhedra for Efficient Oxygen Reduction Reaction in Rechargeable Zinc-Air Batteries, *Adv. Mater.* 34 (2022) 2109605, <https://doi.org/10.1002/adma.202109605>.
29. T. Cui, Y.P. Wang, T. Ye, J. Wu, Z. Chen, J. Li, Y. Lei, D. Wang, Y. Li, Engineering Dual Single-Atom Sites on 2D Ultrathin N-doped Carbon Nanosheets Attaining Ultra-Low-Temperature Zinc-Air Battery, *Angew Chem. Int. Ed.* 61 (2022) 202115219, <https://doi.org/10.1002/anie.202115219>.
30. L. Huang, L. Zuo, T. Yu, H. Wang, Z. He, H. Zhou, S. Su, T. Bian, Two-Dimensional Co/Co<sub>9</sub>S<sub>8</sub> Nanoparticles Decorated N, S Dual-Doped Carbon Composite as an Efficient Electrocatalyst for Zinc-Air Battery, *J. Alloy. Compd.* 897 (2022) 163108, <https://doi.org/10.1016/j.jallcom.2021.163108>.
31. C. Yang, S. Shang, Q. Gu, J. Shang, X. Li, Metal-organic framework-derived carbon nanotubes with multi-active Fe-N/Fe sites as a bifunctional electrocatalyst for zinc-air battery, *J. Energy Chem.* 66 (2022) 306-313, <https://doi.org/10.1016/j.jechem.2021.08.019>.
32. Q. Yu, H. Li, R. Li, S. Zeng, R. Li, Q. Yao, H. Chen, K. Qu, Y. Zheng, Natural DNA-assisted ultrafine FeP embedded in N, P-codoped carbons for efficient oxygen reduction,

- hydrogen evolution and rechargeable zinc-air battery, *Carbon* 186 (2022) 171-179, <https://doi.org/10.1016/j.carbon.2021.09.064>.
33. Rong, J.; Gao, E.; Liu, N.; Chen, W.; Rong, X.; Zhang, Y.; Zheng, X.; Ao, H.; Xue, S.; Huang, B. et al. Porphyrinic MOF-derived rich N-doped porous carbon with highly active CoN<sub>4</sub>C single-atom sites for enhanced oxygen reduction reaction and Zn-air batteries performance. *Energy Storage Materials* 2023, 56, 165
  34. G. Kresse and J. Furthmuller, *Physical Review B*, 1996, 54, 11169-11186.
  35. J. P. Perdew, K. Burke and M. Ernzerhof, *Physical Review Letter*, 1996, 77, 3865-3868.
  36. S. Grimme, *Journal of Computational Chemistry*, 2006, 27, 1787-1799.
  37. J. K. Nørskov, J. Rossmeisl, A. Logadottir, L. Lindqvist, J. R. Kitchin, T. Bligaard and H. Jónsson, *Journal of Physical Chemistry B*, 2004, **108**, 17886–17892.
  38. A. Tripathi, C. Hareesh, S. Sinthika, G. Andersson and R. Thapa, *Appl Surf Sci*, DOI: 10.1016/j.apsusc.2020.146964.
  39. A. Ruban, B. Hammer, P. Stoltze, H. L. Skriver and J. K. Nørskov, *Journal of Molecular Catalysis A: Chemical*, 1997, 115, 421-429.
  40. J. Chang, Q. Zhang, J. Yu, W. Jing, S. Wang, G. Yin, G. I. N. Waterhouse and S. Lu, *Advanced Science*, 2023, 10, 2301656.
